# Supplementary material
Source: publisher site journal article supplement (https://www.dovepress.com/article/351330)
Supplement: Supplementary file 1 [file get_supplementary_file.php]

**Translation, validation, and psychometric evaluation of The Diabetes Quality-Of-Life Brief Clinical Inventory: The Urdu version**

Age: \_\_\_\_\_

Gender: \_\_\_\_\_

Income: \_\_\_\_\_

Education: \_\_\_\_\_

Marital status: \_\_\_\_\_

Locality: \_\_\_\_\_

Occupation: \_\_\_\_\_

Duration of diabetes: \_\_\_\_\_

Treatment module: \_\_\_\_\_

Family history of diabetes: \_\_\_\_\_

**1. How satisfied are you with your current diabetes treatment?**

- i. Very satisfied      ii. Moderately satisfied      iii. Neither      iv. Moderately dissatisfied      v. Very dissatisfied

**2. How satisfied are you with the amount of time it takes to manage your diabetes?**

- i. Very satisfied      ii. Moderately satisfied      iii. Neither      iv. Moderately dissatisfied      v. Very dissatisfied

**3. How often do you find that you eat something you shouldn't rather than tell someone that you have diabetes?**

- i. Never      ii. Very seldom      iii. Sometimes      iv. Often      v. All the time

**4. How often do you worry about whether you will miss work?**

- i. Never      ii. Very seldom      iii. Sometimes      iv. Often      v. All the time

**5. How satisfied are you with the time it takes to determine your sugar level?**

- i. Very satisfied      ii. Moderately satisfied      iii. Neither      iv. Moderately dissatisfied      v. Very dissatisfied

**6. How satisfied are you with the time you spend exercising?**

- i. Very satisfied      ii. Moderately satisfied      iii. Neither      iv. Moderately dissatisfied      v. Very dissatisfied

**7. How often do you have a bad night's sleep because of diabetes?**

- i. Never      ii. Very seldom      iii. Sometimes      iv. Often      v. All the time

**8. How satisfied are you with your sex life?**

- i. Very satisfied      ii. Moderately satisfied      iii. Neither      iv. Moderately dissatisfied      v. Very dissatisfied

**9. How often do you feel diabetes limits your career?**

- i. Never      ii. Very seldom      iii. Sometimes      iv. Often      v. All the time

**10. How often do you have pain because of the treatment for your diabetes?**

- i. Never      ii. Very seldom      iii. Sometimes      iv. Often      v. All the time

**11. How satisfied are you with the burden your diabetes is placing on your family?**

- i. Very satisfied      ii. Moderately satisfied      iii. Neither      iv. Moderately dissatisfied      v. Very dissatisfied

**12. How often do you feel physically ill?**

- i. Never      ii. Very seldom      iii. Sometimes      iv. Often      v. All the time

**13. How often do you worry about whether you will pass out?**

- i. Never      ii. Very seldom      iii. Sometimes      iv. Often      v. All the time

**14. How satisfied are you with time spent getting checkups for your diabetes?**

- i. Very satisfied      ii. Moderately satisfied      iii. Neither      iv. Moderately dissatisfied      v. Very dissatisfied

**15. How satisfied are you with your knowledge about your diabetes?**

- i. Very satisfied      ii. Moderately satisfied      iii. Neither      iv. Moderately dissatisfied      v. Very dissatisfied

ذیابیطیس کوالٹی آف لائف بریف کلینیکل انونٹری: اردو زبان میں ترجمہ، تصدیق اور نفسیاتی تشخیص

عمر:

\_\_\_\_\_

جنس:

\_\_\_\_\_

آمدنی:

\_\_\_\_\_

تعلیم:

\_\_\_\_\_

ازدواجی زندگی:

\_\_\_\_\_

رہائش:

\_\_\_\_\_

پیشہ:

\_\_\_\_\_

ذیابیطیس کا دورانیہ:

\_\_\_\_\_

علاج ماڈیول:

\_\_\_\_\_

خاندان میں ذیابیطیس:

\_\_\_\_\_

1. اپنے ذیابیطیس کے موجودہ علاج سے آپ کتنے مطمئن ہیں۔  
 1۔ بہت مطمئن ii۔ معمولی مطمئن iii۔ نہیں iv۔ معمولی طور  
 7۔ بہت غیر عدم اطمینان
- 2۔ ذیابیطیس کو کنٹرول کرنے کے لیے درکار وقت سے آپ کتنے مطمئن ہیں۔  
 1۔ بہت مطمئن ii۔ معمولی مطمئن iii۔ نہیں iv۔ معمولی طور  
 7۔ بہت غیر عدم اطمینان
- 3۔ کتنی دفعہ بجائے اس کے کہ کسی کے کہنے منصرحت اشیاء کھاتے ہیں۔  
 1۔ نہیں ii۔ بہت کم iii۔ کبھی کبھی iv۔ اکثریت  
 7۔ ہر وقت
- 4۔ کتنی دفعہ آپ کو کام سے رہ جانے کا ڈر رہتا ہے۔  
 1۔ نہیں ii۔ بہت کم iii۔ کبھی کبھی iv۔ اکثریت  
 7۔ ہر وقت
- 5۔ اپنی ذیابیطیس لیول کو معلوم کرنے کے لیے درکار وقت سے آپ اتنا مطمئن ہیں۔  
 1۔ بہت مطمئن ii۔ معمولی مطمئن iii۔ نہیں iv۔ معمولی طور  
 7۔ بہت غیر عدم اطمینان
- 6۔ ورزش کرنے کے لیے درکار وقت سے آپ کتنا مطمئن ہیں۔  
 1۔ نہیں ii۔ بہت کم iii۔ کبھی کبھی iv۔ اکثریت  
 7۔ ہر وقت
- 7۔ ذیابیطیس کی وجہ سے آپ کی نیند کتنی خراب ہوتی ہے۔  
 1۔ بہت مطمئن ii۔ معمولی مطمئن iii۔ نہیں iv۔ معمولی طور  
 7۔ بہت غیر عدم اطمینان
- 8۔ آپ اپنی جنسی زندگی سے کتنا مطمئن ہیں۔  
 1۔ بہت مطمئن ii۔ معمولی مطمئن iii۔ نہیں iv۔ معمولی طور  
 7۔ بہت غیر عدم اطمینان
- 9۔ آپ کو کتنا احساس ہے کہ ذیابیطیس آپ کے مستقبل پر اثر انداز ہوتا ہے۔  
 1۔ نہیں ii۔ بہت کم iii۔ کبھی کبھی iv۔ اکثریت  
 7۔ ہر وقت
- 10۔ ذیابیطیس کے علاج کی وجہ سے آپ کو کتنا درد ہوتا ہے۔  
 1۔ نہیں ii۔ بہت کم iii۔ کبھی کبھی iv۔ اکثریت  
 7۔ ہر وقت
- 11۔ ذیابیطیس کی وجہ سے آپ کے خاندان پر بوجھ سے آپ کتنا مطمئن ہیں۔  
 1۔ بہت مطمئن ii۔ معمولی مطمئن iii۔ نہیں iv۔ معمولی طور  
 7۔ بہت غیر عدم اطمینان
- 12۔ آپ کو جسمانی بیماری کا کتنا احساس ہے۔  
 1۔ نہیں ii۔ بہت کم iii۔ کبھی کبھی iv۔ اکثریت  
 7۔ ہر وقت
- 13۔ ذیابیطیس کے علاج کی خاطر صرف شدہ وقت سے آپ کتنا مطمئن ہیں۔  
 1۔ نہیں ii۔ بہت کم iii۔ کبھی کبھی iv۔ اکثریت  
 7۔ ہر وقت
- 14۔ آپ اپنے ذیابیطیس کے علاج کرنے والے کے وقت سے کتنا مطمئن ہیں۔  
 1۔ نہیں ii۔ بہت کم iii۔ کبھی کبھی iv۔ اکثریت  
 7۔ ہر وقت
- 15۔ ذیابیطیس کے بارے میں اپنے ذاتی معلومات سے کتنا مطمئن ہیں۔  
 1۔ نہیں ii۔ بہت کم iii۔ کبھی کبھی iv۔ اکثریت  
 7۔ ہر وقت
